Supplementary Table 1. The sequences required for TagMap. The sequences in bold represent the B adaptor sequence and should be appended before the specific primers (underlined) used to amplify specific targets.

| Primer name         | Sequence                                                                 |
|---------------------|--------------------------------------------------------------------------|
| B-pBac-142R         | 5' <b>GTCTCGTGGGCTCGGAGATGTGTATAAGAGACAG</b> <u>CATTGACAAGCACGCCTCAC</u> |
| B-pBac-3287F        | 5' <b>GTCTCGTGGGCTCGGAGATGTGTATAAGAGACAG</b> <u>TAAACCTCGATATACAGACC</u> |
| Tn5ME-A-adaptor     | 5' TCGTCGGCAGCGTCAGATGTGTATAAGAGACAG                                     |
| Tn5MErev-InT        | 5' /5Phos/CTGTCTCTTATACACATC/3InvdT/                                     |
| A-idx-i5 (Ns = idx) | 5' AATGATACGGCGACCACCGAGATCTACACNNNNNNNNTCGTCGGCAGCGTC                   |
| B-idx-i7 (Ns = idx) | 5' CAAGCAGAAGACGGCATAACGAGATNNNNNNNNGTCTCGTGGGCTCGG                      |
| FC2                 | 5' AATGATACGGCGACCACCGA                                                  |
| Seq primer          | 5' TCGTCGGCAGCGTCAGATGTGTATAAGAGACAG                                     |
